# The American Journal of Psychiatry

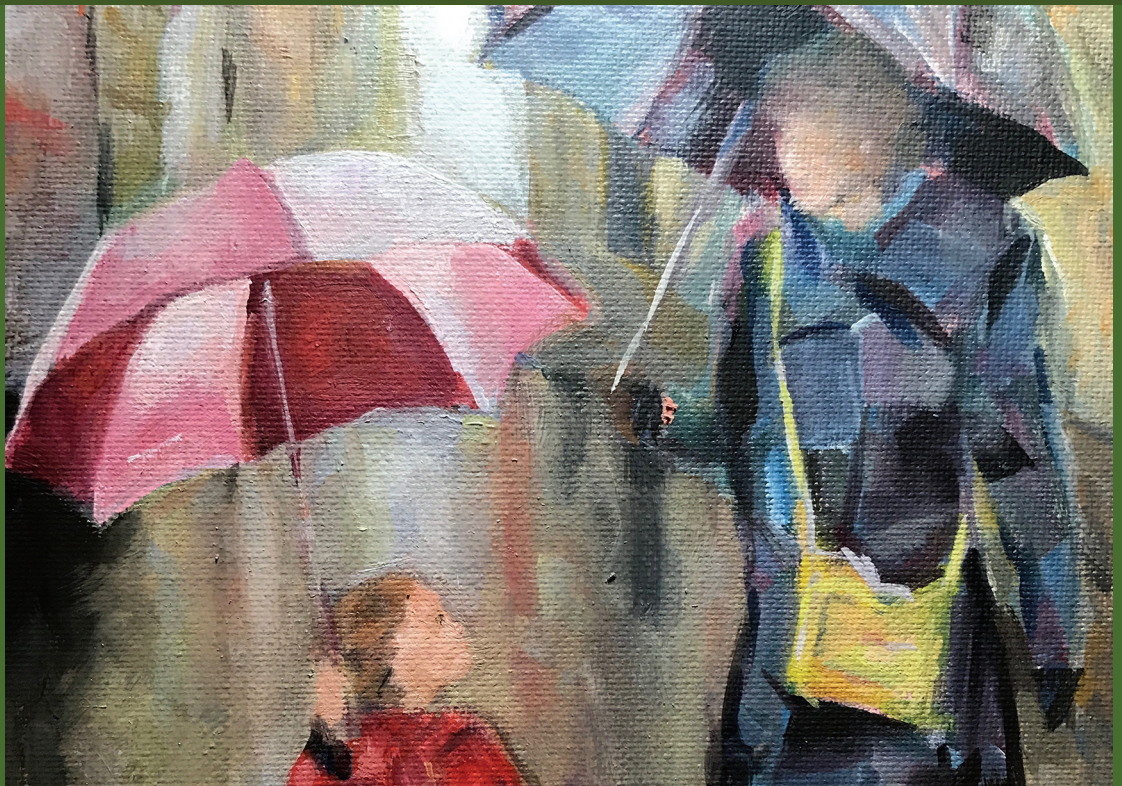

A Randomized Controlled Trial of Parent-Child Psychotherapy  
Targeting Emotion Development for Early Childhood Depression

Association of Maternal Insecticide Levels With Autism in  
Offspring From a National Birth Cohort

Association Between Smoking Behavior and Cognitive Functioning  
in Patients With Psychosis, Siblings, and Healthy Control Subjects

White Matter Abnormalities in Never-Treated Patients  
With Long-Term Schizophrenia
