## PERSPECTIVAS

### EDITORIALES

- 1051 Ventana de oportunidad de desarrollo: Implicaciones de la psicoterapia padre/madre-hijos para el tratamiento de la depresión en la infancia temprana**  
*Wendy K. Silverman, Ph.D., Jeremy W. Pettit, Ph.D.*
- 1054 Consumo de cigarrillos, desempeño cognitivo y enfermedad mental grave: Dejar de fumar parece que realmente sí importa**  
*Philip D. Harvey, Ph.D.*
- 1056 Los antipsicóticos y su impacto en la sustancia blanca del cerebro: ¿Parte del problema o parte de la solución?**  
*Marek Kubicki, M.D., Ph.D., Amanda E. Lyall, Ph.D.*
- 1058 Estimaciones de la heredabilidad basadas en la población arrojan nueva luz sobre las características clínicas de la depresión mayor**  
*Francis J. McMahon, M.D.*

### CONFERENCIA DE CASO CLÍNICO

- 1061 Una mujer transgénero con incapacidad intelectual y trastorno límite de la personalidad**  
*William J. Newman, M.D., et al.* **EMC • AUDIO**

### TRATAMIENTO EN PSIQUIATRÍA

- 1064 Tratamiento de víctimas de abuso sexual infantil**  
*Rochelle F. Hanson, Ph.D., Elizabeth Wallis, M.D.*

### PERSPECTIVAS EN SALUD MENTAL GLOBAL

- 1071 Efectos terapéuticos de las prácticas tradicionales de “cumplir el mes” (o “hacer cuarentena”) en la depresión postparto en China**  
*Guodong Ding, M.D., et al.*

### REVISIÓN Y RESEÑAS

- 1073 Activación inmunológica materna y enfermedades neuropsiquiátricas: Una perspectiva de investigación traslacional**  
*Alan S. Brown, M.D, M.P.H., Urs Meyer, Ph.D.* **AUDIO**

Cuestionar las vías de desarrollo de la activación inmunológica materna e identificar fenotipos específicos comunes en humanos y animales puede arrojar luz sobre la etiología de las principales enfermedades neuropsiquiátricas, incluyendo los procesos que implican la transmisión intergeneracional de enfermedades.

- 1084 Los síntomas depresivos maternos perinatales como tema de la salud de la población**  
*Michael J. Meaney, Ph.D.*

Los síntomas depresivos maternos durante el período perinatal están ligados a resultados adversos del neurodesarrollo en niños, según aparecen cuantificados por los informes clínicos, la observación comportamental y las imágenes cerebrales. La amplitud y profundidad de estos datos hacen que los síntomas depresivos maternos sean un tema clave de la salud pública.

## NUEVAS INVESTIGACIONES

### ARTÍCULOS

- 1094 Asociación entre los niveles de insecticida maternos y el autismo en los hijos de una cohorte de nacimiento nacional**

*Alan S. Brown, M.D., M.P.H., et al.* **AUDIO**

Se utilizaron datos únicos de una cohorte de nacimiento finlandesa para evaluar el riesgo de autismo asociado a un grupo de variables del entorno. El riesgo de autismo estuvo ligado a la presencia en el suero materno de un metabolito para el insecticida dicloro difenil tricloroetano (DDT).

- 1102 Un ensayo controlado aleatorizado de psicoterapia padre/madre-hijo para el desarrollo de las emociones para la depresión en la infancia temprana**

*Joan L. Luby, M.D., et al.* **EDITORIALE • EMC • AUDIO • VIDEO**

Un tratamiento basado en la terapia para los trastornos de la conducta disruptiva se puede adaptar y utilizarse como una opción efectiva de tratamiento para la depresión en la infancia temprana.

## 1111 Procesamiento de las recompensas en la depresión: Una revisión conceptual y meta-analítica de estudios de IRMf y EEG

Hanna Keren, Ph.D., et al.

Se identificaron aberraciones neurales consistentes durante el proceso de recompensas en depresión, y dichas aberraciones pueden subyacer la patogénesis de la enfermedad y podrían informar nuevos tratamientos.

## 1121 Asociación entre el comportamiento de fumar y el funcionamiento cognitivo en pacientes con psicosis, hermanos y sujetos sanos de control: Resultados de un seguimiento prospectivo de 6 años

Jentien M. Vermeulen, M.D., et al. EDITORIALE • EMC • AUDIO

En una muestra grande de pacientes con psicosis, sus hermanos e individuos sanos, el hábito de fumar se ligó a un desempeño cognitivo pobre en los tres grupos. Este resultado sugiere que fumar tiene efectos nocivos para la cognición, independientemente de la presencia de la psicosis y del riesgo familiar.

## 1129 Anomalías estructurales de la sustancia blanca en pacientes con esquizofrenia a largo plazo que nunca han sido tratados

Yuan Xiao, M.D., et al. EDITORIALE • VIDEO

Los pacientes con esquizofrenia a largo plazo que nunca habían recibido tratamiento tuvieron más perturbaciones en la estructura cerebral que los pacientes tratados y de características similares con los que habían sido apareados, lo que sugiere que la exposición a los antipsicóticos puede conferir beneficios a la sustancia blanca del cerebro durante el curso a largo plazo de la enfermedad.

## 1137 La epidemiología genética de la depresión mayor tratada, en Suecia

Kenneth S. Kendler, M.D., et al. EDITORIALE

Con información de registros de población suecos, se utilizó un diseño de estudio de gemelos para revelar nuevos datos sobre los aportes genéticos y ambientales a los trastornos depresivos, lo que indicó que sería factible realizar estudios de gran escala sobre la heredabilidad de la depresión mayor en poblaciones similares.

## COMUNICADOS Y ACTUALIZACIONES

### CARTAS AL EDITOR

#### 1145 Reconsolidación de recuerdos traumáticos utilizando la psicoterapia

Wendi M. Waits, M.D., Charles W. Hoge, M.D.

#### 1145 Sobre el uso de los mecanismos de actualización de la memoria para tratar a los pacientes: Respuesta a Waits y Hoge

Alain Brunet, Ph.D., et al.

### RESEÑAS BIBLIOGRÁFICAS

#### 1147 Transgender Mental Health [Salud mental transgénero]

Robert D. Davies, M.D.

#### 1148 Transcranial Magnetic Stimulation: Clinical Applications for Psychiatric Practice [Estimulación magnética transcraneal: Aplicaciones clínicas para la práctica psiquiátrica]

Adam Philip Stern, M.D.

#### 1149 Integrated Care: A Guide for Effective Implementation [Atención integral: Una guía para la implementación efectiva]

Oliver M. Glass, M.D.

#### 1149 Physician Suicide: Cases and Commentaries [Suicidio de médicos: Casos y comentarios]

Laura Bajor, D.O.

## OTROS TEMAS DE INTERÉS

### 1151 Educación Médica Continuada

**Cubierta:** [Luby et al. (p. 1102) describe joint treatment of early childhood depression and the parent's anxiety. Cover art is detail of "Margaux I" by Joe Silver (<http://www.joesilverstudio.com>). Original painting is oil on canvas board, 8" x 10".]

**AUDIO** Article is highlighted in AJP Audio, a downloadable .mp3 file available at [ajp.psychiatryonline.org](http://ajp.psychiatryonline.org)

**EDITORIALE** Article is discussed in one of the issue's editorials

**EMC** A course covering the content of this article is available online for paid subscribers to the AJP CME Course program

**VIDEO** Article is highlighted online by Deputy Editor Daniel S. Pine, M.D.

**La Tabla de Contenidos y resúmenes de Este Número Está Disponible en Español**  
(Abstracts are also available in Spanish)

Translation presented in collaboration with the Office of Global Health, Rutgers-Robert Wood Johnson Medical School. Support for this effort provided by ACTA Colombia.

**Translation courtesy of**

**Sergi Casals, M.A.**, Garuna, Medellín, Colombia ([www.garunaeditors.com](http://www.garunaeditors.com))

**Carlos López Jaramillo, M.D., M.Sc., Ph.D.**, Universidad de Antioquia, Medellín, Colombia

**Javier I. Escobar, M.D., M.Sc.**, Rutgers-Robert Wood Johnson Medical School

# Activación inmunológica materna y enfermedades neuropsiquiátricas: Una perspectiva de investigación traslacional

Alan S. Brown, M.D., M.P.H., Urs Meyer, Ph.D.

Los estudios epidemiológicos, incluyendo las investigaciones prospectivas de cohortes de nacimiento, han implicado la activación inmunológica materna en la etiología de los trastornos neuropsiquiátricos. La inflamación y los patógenos maternos infecciosos son factores de riesgo plausibles para estos resultados y se han asociado a la esquizofrenia, a los trastornos del espectro autista y al trastorno bipolar. Paralelamente a la investigación epidemiológica existen modelos animales de la activación inmunológica prenatal, que han documentado alteraciones comportamentales, neuroquímicas, neuroanatómicas y neuropsicológicas que son reflejo de los fenotipos observados en estos trastornos neuropsiquiátricos. Los estudios epidemiológicos de activación inmunológica materna ofrecen la ventaja de evaluar directamente poblaciones humanas, pero son limitados en cuanto a su capacidad de revelar mecanismos patogénicos. Los modelos animales, por el contrario, tienen limitaciones en cuanto a la posibilidad de generalizar sus hallazgos para trastornos psiquiátricos, pero han logrado avances importantes en el des-

cubrimiento de relaciones causales y vías patológicas entre la activación inmunológica materna y los fenotipos neuropsiquiátricos. La incorporación de estos factores de riesgo a los modelos animales traslacionales inversos de activación inmunológica materna ha permitido obtener gran riqueza de datos que apoyan el potencial predictivo de los estudios epidemiológicos. Para aumentar más la traducción de equivalencia entre la epidemiología y la ciencia básica, los autores proponen un enfoque complementario que incluye deconstrucción de los resultados neuropsicológicos de la activación inmunológica materna en fenotipos fisiopatológicos definidos esenciales que sean identificables en humanos y en animales y que evalúen la concordancia entre especies en cuanto a las interacciones entre la activación inmunológica materna y los factores genéticos y epigenéticos, incluyendo los procesos que implican la transmisión intergeneracional de enfermedades.

*(Am J Psychiatry 2018; 175:1073–1083)*

## AJP A LOS 175 AÑOS

Recordando nuestro pasado mientras  
visualizamos nuestro futuro

### Octubre 1857: La patología de la locura

J.C. Bucknill: "En el cerebro el estado de inflamación en sí, o desaparece muy rápidamente o causa la muerte muy temprano; pero cuando desaparece, deja consecuencias que a menudo son las causas de la locura, y los estados de la atrofia cerebral."

*(Am J Psychiatry 1857; 14:172–193)*

## Los síntomas depresivos maternos perinatales como tema de la salud de la población

Michael J. Meaney, Ph.D.

La importancia de la depresión materna para los resultados en los niños está bien establecida, y los déficits en la función psicosocial y en el ejercicio de la maternidad son igual de graves en mujeres con niveles subsindrómicos altos de síntomas depresivos como en mujeres con depresión clínica. El autor hizo una revisión sistemática que exploró la asociación entre los síntomas depresivos maternos y los resultados en el neurodesarrollo del niño, incluyendo estudios de neuroimágenes. Los resultados indican claramente que la influencia de

los síntomas depresivos maternos opera en todo un continuo para influir en los resultados en el niño, lo que implica que es adecuado considerar que la depresión materna es un tema de salud poblacional. Esta conclusión se ve reforzada por hallazgos recientes que revelan claras influencias positivas de la salud mental interna en el ejercicio de la maternidad y en los resultados en el niño.

*(Am J Psychiatry 2018; 175:1084–1093)*

### **AJP A LOS 175 AÑOS**

Recordando nuestro pasado mientras  
visualizamos nuestro futuro

#### **Abril 1851: Fleetwood Churchill, "Sobre los trastornos mentales del embarazo y el parto"**

"Las mujeres con un desequilibrio mental de cualquier grado durante el embarazo tienen mayor predisposición que las demás a la manía puerperal. Pero la seria naturaleza de dichos ataques es aún más delicada por el hecho, ampliamente probado, que el daño no se limita a la madre. No son solamente los trastornos orgánicos del cuerpo los que se pueden transmitir al infante, sino una predisposición a la locura, elevando así el nivel de alerta de manera alarmante."

*(Am J Psychiatry 1851; 7:297–317)*

# Asociación entre los niveles de insecticida maternos y el autismo en los hijos de una cohorte de nacimiento nacional

Alan S. Brown, M.D., M.P.H., Keely Cheslack-Postava, Ph.D., Panu Rantakokko, Ph.D., Hannu Kiviranta, Ph.D., Susanna Hinkka-Yli-Salomäki, Ph.D., Ian W. McKeague, Ph.D., Heljä-Marja Surcel, Ph.D., Andre Sourander, M.D., Ph.D.

**Objetivo:** El autismo es un trastorno complejo del neurodesarrollo con una etiología en gran parte desconocida. Hasta la fecha, pocos estudios han investigado la exposición prenatal a las toxinas y el riesgo de autismo utilizando biomarcadores maternos de exposición. Los contaminantes orgánicos persistentes son compuestos orgánicos halogenados lipofílicos e incluyen el insecticida dicloro difenil tricloroetano (DDT), así como su metabolito p,p'-dicloro difenil dicloro etileno (p,p'-DDE) y bifenilos policlorados (PCB). El objetivo de este estudio fue evaluar si los niveles maternos elevados de contaminantes orgánicos persistentes están asociados al autismo en los hijos.

**Método:** La investigación se derivó del Estudio Prenatal Finlandés del Autismo, un estudio nacional de cohortes de nacimiento basado en un diseño anidado de casos y controles. Por medio de enlaces al registro nacional, se constataron los casos de autismo en niños nacidos entre 1987 y 2005. En los casos de autismo infantil y los correspondientes sujetos control (778 pares de casos y controles), los especímenes de suero materno del embarazo temprano se ensayaron para niveles de p,p'-DDE y niveles totales de PCB.

**Resultados:** La probabilidad de autismo entre los hijos aumentó de forma significativa a más del doble con niveles maternos de p,p'-DDE que estuvieran en el percentil 75 más alto, con ajuste de la edad materna, la paridad y el historial de trastornos psiquiátricos (*odds ratio*=1,32; IC 95%=1,02 a 1,71). La probabilidad de autismo con incapacidad intelectual aumentó más del doble con niveles maternos de p,p'-DDE por encima de este umbral (*odds ratio*=2,21; IC 95%=1,32 a 3,69). No hubo ninguna asociación entre los niveles totales de PCB maternos y el autismo.

**Conclusiones:** Estos hallazgos ofrecen las primeras pruebas basadas en biomarcadores de que la exposición materna a insecticidas está asociada al autismo en los hijos. Aunque es necesario seguir investigando para replicar este hallazgo, el presente estudio tiene implicaciones para la prevención del autismo y puede ofrecer una mejor comprensión de su patogénesis.

(*Am J Psychiatry* 2018; 175:1094–1101)

## Un ensayo controlado aleatorizado de psicoterapia padre/madre-hijo para el desarrollo de las emociones para la depresión en la infancia temprana

Joan L. Luby, M.D., Deanna M. Barch, Ph.D., Diana Whalen, Ph.D., Rebecca Tillman, M.S., Kenneth E. Freedland, Ph.D.

**Objetivo:** La depresión clínica en niños desde los 3 años ha sido validada y las tasas de prevalencia son similares a las del trastorno en edad escolar. Se ha observado continuidad homotípica entre la depresión infantil temprana y la posterior, con alteraciones en la función y la estructura cerebrales similares a las que se reportan en los adultos deprimidos. Estos hallazgos resaltan la importancia de identificar y tratar la depresión tan temprano como sea posible en términos de su desarrollo, por la relativa resistencia al tratamiento y los reducidos tamaños de efecto pequeños para los tratamientos en etapas posteriores de la vida. Los autores realizaron un ensayo aleatorizado controlado de una psicoterapia diádica padre/madre-hijo para la depresión en la infancia temprana que se centra en fomentar la competencia emocional y la regulación emocional del niño.

**Método:** Una versión modificada de la terapia de interacción entre padre/madre e hijo empíricamente probada, con un nuevo módulo de "desarrollo emocional" (PCIT-ED, por sus siglas en inglés) se comparó con la condición de estar en lista de espera en un ensayo aleatorizado en 229 días

padre/madre-hijo con niños de entre 3 y 6,11 años. Ambos estudios duraron 18 semanas.

**Resultados:** Los niños en el grupo PCIT-ED tuvieron tasas más bajas de depresión (resultado primario), menor gravedad de la depresión y menor déficit en comparación con los que estaban en condición de lista de espera (valores  $d$  de Cohen,  $>1,0$ ). Las medidas de funcionamiento emocional infantil y estrés y depresión por el ejercicio de la maternidad mejoraron significativamente en el grupo de PCIT-ED.

**Conclusiones:** Los hallazgos de este ensayo controlado aleatorizado de una psicoterapia padre/madre-hijo para la depresión en la infancia temprana sugieren que la identificación e intervención temprana en este trastorno crónico y recurrente representa una nueva vía clave para un tratamiento más efectivo. La aplicación del PCIT-ED manualizado, administrado por clínicos con nivel de maestría, es factible en escenarios de salud comunitaria.

*(Am J Psychiatry 2018; 175:1102–1110)*

# Procesamiento de las recompensas en la depresión: Una revisión conceptual y meta-analítica de estudios de IRMf y EEG

Hanna Keren, Ph.D., Georgia O'Callaghan, Ph.D., Pablo Vidal-Ribas, M.Sc., George A. Buzzell, Ph.D., Melissa A. Brotman, Ph.D., Ellen Leibenluft, M.D., Pedro M. Pan, M.D., Ph.D., Liana Meffert, B.Sc., Ariela Kaiser, B.A., Selina Wolke, M.Sc., Daniel S. Pine, M.D., Argyris Stringaris, M.D., Ph.D.

**Objetivo:** Por mucho tiempo se ha sugerido que el procesamiento de recompensas aberrante juega un papel en la patogénesis de la depresión. Sin embargo, todavía ninguna revisión ha examinado su papel en la depresión por medio de la integración de hallazgos conceptuales y cuantitativos usando IRM (IRMf) y EEG. Los autores cuantificaron estos efectos, con énfasis en el desarrollo.

**Método:** Un total de 38 estudios de IRMf y 12 estudios de EEG se incluyeron en los meta-análisis. Estudios de IRMf examinaron primariamente anticipación a la recompensa y retroalimentación a la recompensa. Estas se analizaron utilizando el método de estimación de la probabilidad de activación. Los estudios de EEG implicaron principalmente el potencial relacionado con eventos de la negatividad relacionada con la retroalimentación (FRN, por sus siglas en inglés) y dichos estudios se analizaron utilizando meta-análisis de efectos aleatorios de la asociación entre la FRN y la depresión.

**Resultados:** El análisis de estudios de IRMf reveló activación del estriado reducida de forma significativa en individuos

deprimidos en comparación con individuos sanos, durante la retroalimentación a la recompensa. Cuando se incluyeron los análisis de región de interés, también se observó activación reducida en la anticipación de la recompensa, un efecto que fue más marcado en individuos de menos de 18 años. La FRN también fue reducida de manera significativa en la depresión, con efectos pronunciados en individuos de menos de 18 años. En estudios longitudinales se encontró que activación reducida del estriado en IRMf y menor FRN en EEG antes del inicio de la depresión en los adolescentes.

**Conclusiones:** Considerados de forma conjunta, los hallazgos muestran aberraciones neurales consistentes durante el procesamiento de recompensas en la depresión, a saber, señal reducida del estriado durante la retroalimentación y FRN disminuida. Estas aberraciones pueden subyacer la patogénesis de la depresión y tienen importantes implicaciones para el desarrollo de nuevos tratamientos.

(*Am J Psychiatry* 2018; 175:1111–1120)

## Asociación entre el comportamiento de fumar y el funcionamiento cognitivo en pacientes con psicosis, hermanos y sujetos sanos de control: Resultados de un seguimiento prospectivo de 6 años

Jentien M. Vermeulen, M.D., Frederike Schirmbeck, Ph.D., Matthijs Blankers, Ph.D., Mirjam van Tricht, Ph.D., Richard Bruggeman, M.D., Ph.D., Wim van den Brink, M.D., Ph.D., Lieuwe de Haan, M.D., Ph.D., Genetic Risk and Outcome of Psychosis (GROUPE) investigators

**Objetivo:** La alta prevalencia del hábito de fumar y los déficits cognitivos en los pacientes con esquizofrenia son dos fenómenos bien conocidos, pero los hallazgos con respecto a la asociación entre ambos son contradictorios y no hay estudios longitudinales. Los autores se propusieron examinar la asociación multi-transversal entre el comportamiento y el desempeño fumadores en dominios cognitivos específicos y la asociación longitudinal entre el cambio en el comportamiento fumador y el cambio en el funcionamiento cognitivo en un estudio prospectivo grande.

**Método:** Los autores realizaron un estudio de cohorte de pacientes con psicosis no afectiva (N=1.094), sus hermanos (N=1.047) y sujetos sanos de control (N=579). Al inicio del estudio y en los seguimientos a los 3 y a los 6 meses, el comportamiento fumador se evaluó con la Entrevista Diagnóstica Internacional Compuesta (CIDI, por sus siglas en inglés) y el funcionamiento cognitivo, con una batería de pruebas. Se realizaron análisis de regresión de efectos mixtos lineales y multivariados para evaluar las asociaciones entre el hábito de fumar y los dominios cognitivos, y se ajustó la variación en los factores demográficos, la psicopatología, la mediación y el consumo de sustancias. Para la evaluación múltiple se aplicó la corrección de Bonferroni.

**Resultados:** Al inicio del estudio, 66,6% de los pacientes fumaban, en comparación con 38,3% de los hermanos y 25,2% de los sujetos control. Se encontraron asociaciones multi-transversales significativas entre el hábito de fumar y la velocidad lenta de procesamiento en los grupos de pacientes y control en comparación con el grupo de pacientes no fumadores (estimado=-2,38; SE=0,84) y el grupo control de no fumadores (estimado=-3,13; SE=1,06). En los hermanos, el hábito de fumar estuvo asociado de manera significativa a un peor desempeño de la memoria de trabajo y del razonamiento y la resolución de problemas en comparación con los no fumadores. Además, el número de cigarrillos consumidos por día estuvo asociado negativamente a estos dominios. Los pacientes, pero no los hermanos ni los sujetos control, que dejaron de fumar mostraron una mejora significativa de la velocidad de procesamiento (estimado=4,90; SE=1,73).

**Conclusiones:** Los hallazgos del estudio indican que el hábito de fumar está asociado a un peor desempeño cognitivo en los pacientes, sus hermanos y sujetos control en comparación con los no fumadores. Dejar de fumar puede mejorar la velocidad de procesamiento en los pacientes.

(*Am J Psychiatry* 2018; 175:1121-1128)



# Anomalías estructurales de la sustancia blanca en pacientes con esquizofrenia a largo plazo que nunca han sido tratados

Yuan Xiao, M.D., Huaiqiang Sun, Ph.D., Shulin Shi, M.D., Dan Jiang, M.D., Bo Tao, M.D., Youjin Zhao, Ph.D., Wenjing Zhang, Ph.D., Qiyong Gong, M.D., Ph.D., John A. Sweeney, Ph.D., Su Lui, M.D., Ph.D.

**Objetivo:** Este estudio evaluó las diferencias de la integridad de la sustancia blanca entre pacientes con esquizofrenia a largo plazo que habían sido tratados y pacientes que nunca habían recibido tratamiento. Los pacientes fueron apareados según la duración de la enfermedad y cambios diferenciales en relación a la edad en estos dos grupos, con respecto a sujetos sanos de comparación.

**Método:** Este estudio transversal de imágenes con tensores de difusión incluyó 31 pacientes que nunca habían recibido tratamiento y 46 pacientes tratados con antipsicóticos, todos con esquizofrenia a largo plazo, y 58 sujetos sanos de comparación. Se extrajeron y compararon medidas de anisotropía fraccional de los tractos de sustancia blanca. Se utilizó el análisis de regresión lineal para explorar la asociación entre la edad y la anisotropía fraccional en los tres grupos.

**Resultados:** La anisotropía fraccional difirió de manera significativa entre los tres grupos en 14 de 20 tractos de sustancia blanca definidos en el patrón de sustancia blanca de la Universidad Johns Hopkins. Los pacientes que nunca habían recibido tratamiento mostraron una mayor reducción de la anisotropía fraccional que los pacientes tratados con anti-

psicóticos en la radiación talámica anterior izquierda, la vía cíngulo-hipotálamo izquierda, el esplenio y genu del cuerpo caloso y el fascículo longitudinal superior izquierdo, y mayor anisotropía fraccional en el fascículo uncinado derecho. Ambos grupos de pacientes mostraron múltiples reducciones en comparación con los sujetos de comparación. Los pacientes que nunca habían recibido tratamiento mostraron una reducción acelerada y clínicamente relevante de la anisotropía fraccional en el genu del cuerpo caloso.

**Conclusiones:** Estos hallazgos psico-radiológicos brindan información acerca de la distribución regional de los déficits de sustancia blanca en los años posteriores al inicio de la enfermedad en la esquizofrenia a largo plazo. Los hallazgos de mayores déficits en pacientes que nunca han recibido tratamiento, y una reducción mayor asociada a la edad en el genu del cuerpo caloso en estos pacientes, sugieren que el tratamiento con antipsicóticos a largo plazo no afecta de manera adversa los tractos de sustancia blanca en el curso a más largo plazo de la enfermedad y puede conferir beneficios.

(*Am J Psychiatry* 2018; 175:1129–1136)

## La epidemiología genética de la depresión mayor tratada, en Suecia

Kenneth S. Kendler, M.D., Henrik Ohlsson, Ph.D., Paul Lichtenstein, Ph.D., Jan Sundquist, M.D., Ph.D., Kristina Sundquist, M.D., Ph.D.

**Objetivo:** Los autores examinaron la heredabilidad de la depresión mayor tratada, en un diseño de gemelos y hermanos completos/medios, para describir características genéticas claves de la depresión mayor y para determinar qué índices clínicos de responsabilidad genética predicen de manera óptima el riesgo de depresión en los familiares.

**Método:** Los autores examinaron todos los casos tratados de depresión mayor en Suecia que constaban en los registros de las unidades de hospitalización, de consultas con especialistas y de atención primaria y, utilizando *OpenMx*, estimaron el papel etiológico de los factores genéticos y ambientales de parejas de gemelos monicigóticos y dicigóticos y de hermanos completos y medios criados juntos y separados (total N=1.718.863 parejas). Se examinaron ocho índices de riesgo genético en 875.010 parejas probando-familiar.

**Resultados:** La heredabilidad de la depresión mayor en hombres y mujeres fue estimada a 0,41 (IC 95%=0,21 a 0,49) y 0,49 (IC 95%=0,31 a 0,56), respectivamente, en el diseño de gemelos y 0,36 (IC 95%=0,31 a 0,38) y 0,51 (IC 95%=0,51 a 0,53), respectivamente, en el diseño independiente de hermanos

completos/medios. La mejor estimación de la correlación en efectos genéticos en los dos sexos fue 0,89 (IC 95%=0,87 a 0,91). Los resultados también mostraron evidencia de efectos ambientales compartidos moderados (0,02–0,05). Siete de los ocho índices predijeron riesgo de depresión mayor en los familiares, con efectos más fuertes en aquellos con una relación más cercana. Los índices más fuertes fueron la corta edad al inicio, la recurrencia, el trastorno de ansiedad comórbido y las medidas de gravedad clínica.

**Conclusiones:** En una muestra nacional grande, la heredabilidad de la depresión mayor fue similar cuando se estimó en diseños de gemelos y de hermanos completos/medios. La heredabilidad de la depresión mayor fue mayor en mujeres que en hombres, y ambos sexos compartieron la mayoría, aunque no todos, de los factores de riesgo genéticos. En los individuos afectados, el riesgo genético de depresión mayor podría evaluarse de forma significativa a partir de índices clínicos normalmente disponibles.

(*Am J Psychiatry* 2018; 175:1137–1144)
